# Supplementary material for: Insights into the multifunctional applications of strategically Co doped MoS2 nanoflakes
Source: Royal Society of Chemistry journal article supplement (doi:10.1039/d2ma00738j), 2022-01-01
Supplement: d2ma00738j1.pdf [file d2ma00738j1.pdf]

## Supplementary Information

### Insights into the Multifunctional Applications of Strategical Co doped MoS<sub>2</sub> Nanoflakes

R. Rahman<sup>1</sup>, S. Chowdhury<sup>1</sup>, D. Samanta<sup>2</sup>, A. Pathak<sup>2</sup> and T. K. Nath\*<sup>1</sup>

<sup>1</sup>Department of Physics, Indian Institute of Technology Kharagpur, West Bengal 721302, India

<sup>2</sup>Department of Chemistry, Indian Institute of Technology Kharagpur, West Bengal 721302, India

#### S1 XRD data analysis

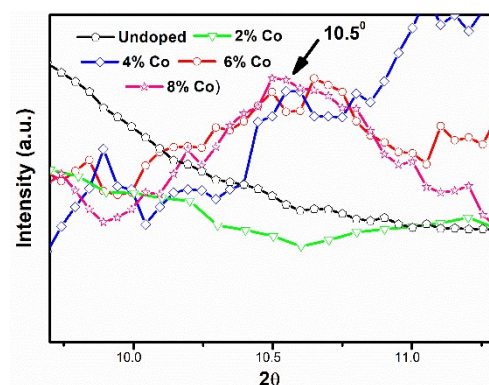

**Fig. S1** Magnified image of XRD plot indicating evolution of 1T phase in 2H phase MoS<sub>2</sub> with increase in Co doping.

## S2. VSM data

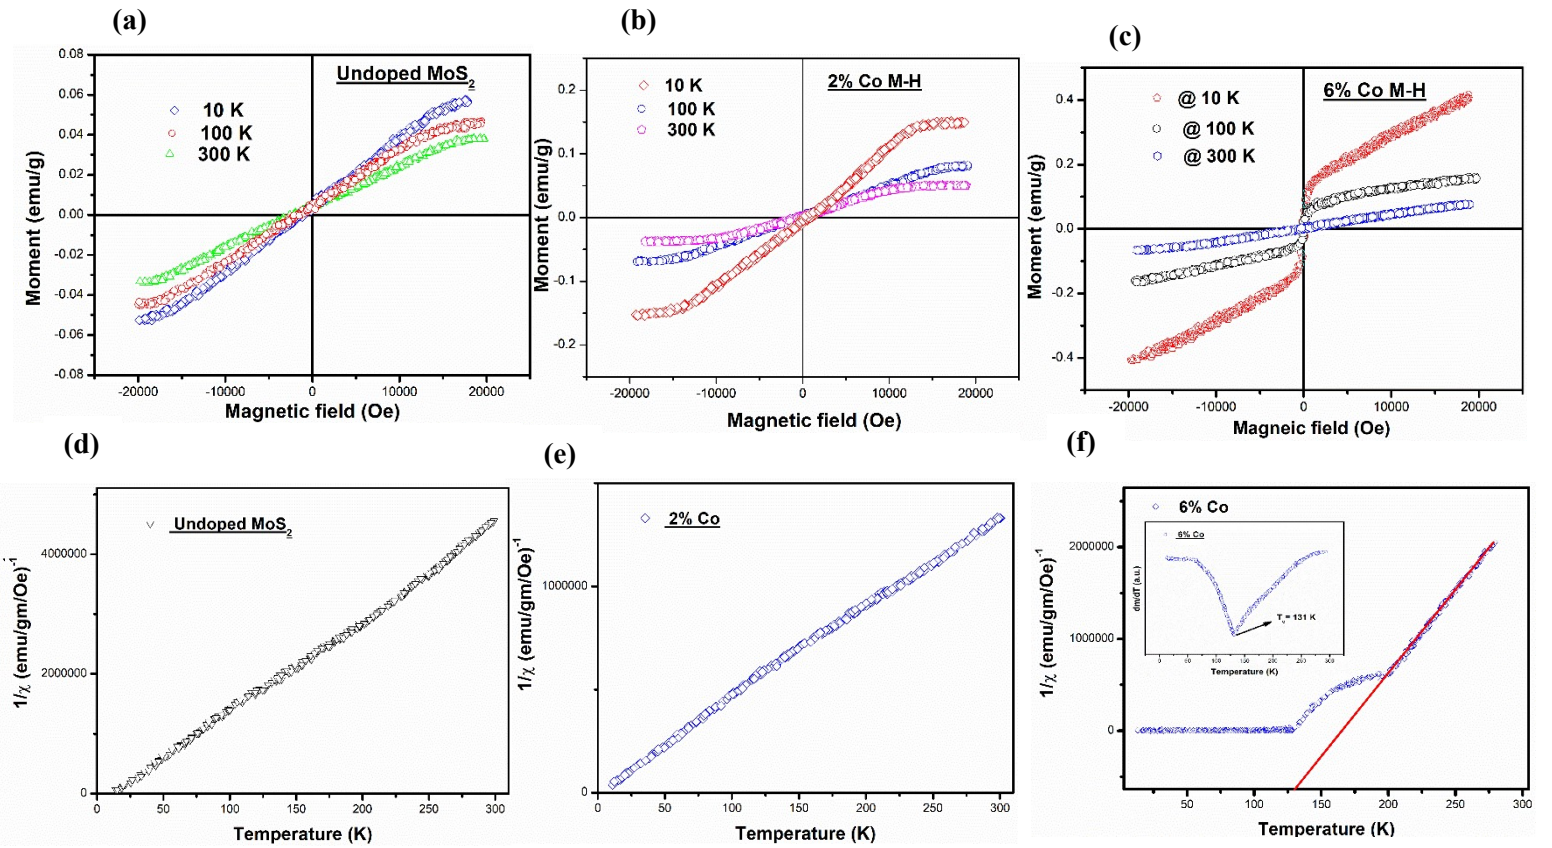

**Fig. S2** M vs H hysteresis loop of (a) undoped MoS<sub>2</sub>, (b) 2% Co, (c) 6% Co at 10K, 100 K and 300 K within applied magnetic field range of -2T to 2 T. (d), (e), (f) represent 1/χ vs T plot corresponding to undoped, 2% Co doped MoS<sub>2</sub> (paramagnetic nature) and 6% Co doped MoS<sub>2</sub> (ferromagnetic nature); inset of (f) shows minima of dm/dT plot indicating T<sub>c</sub> of 6% Co doped MoS<sub>2</sub> NFs at 131 K.

### S3 Theoretical result

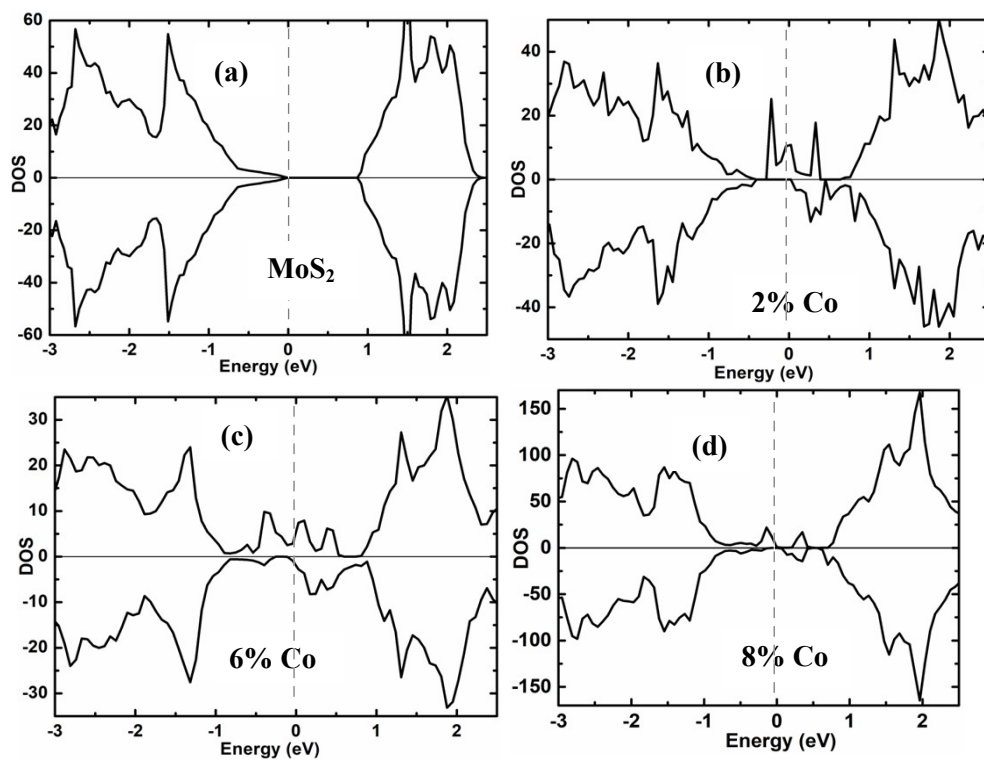

**Fig. S3** Total density of states (TDOS) of (a) undoped MoS<sub>2</sub> supercell; (b) the supercell with 2% Co dopant; (c) the supercell with 6% Co and (d) the supercell with 8% Co dopant atom (the vertical dashed line indicates the Fermi level).

## S4 Electrochemical analysis

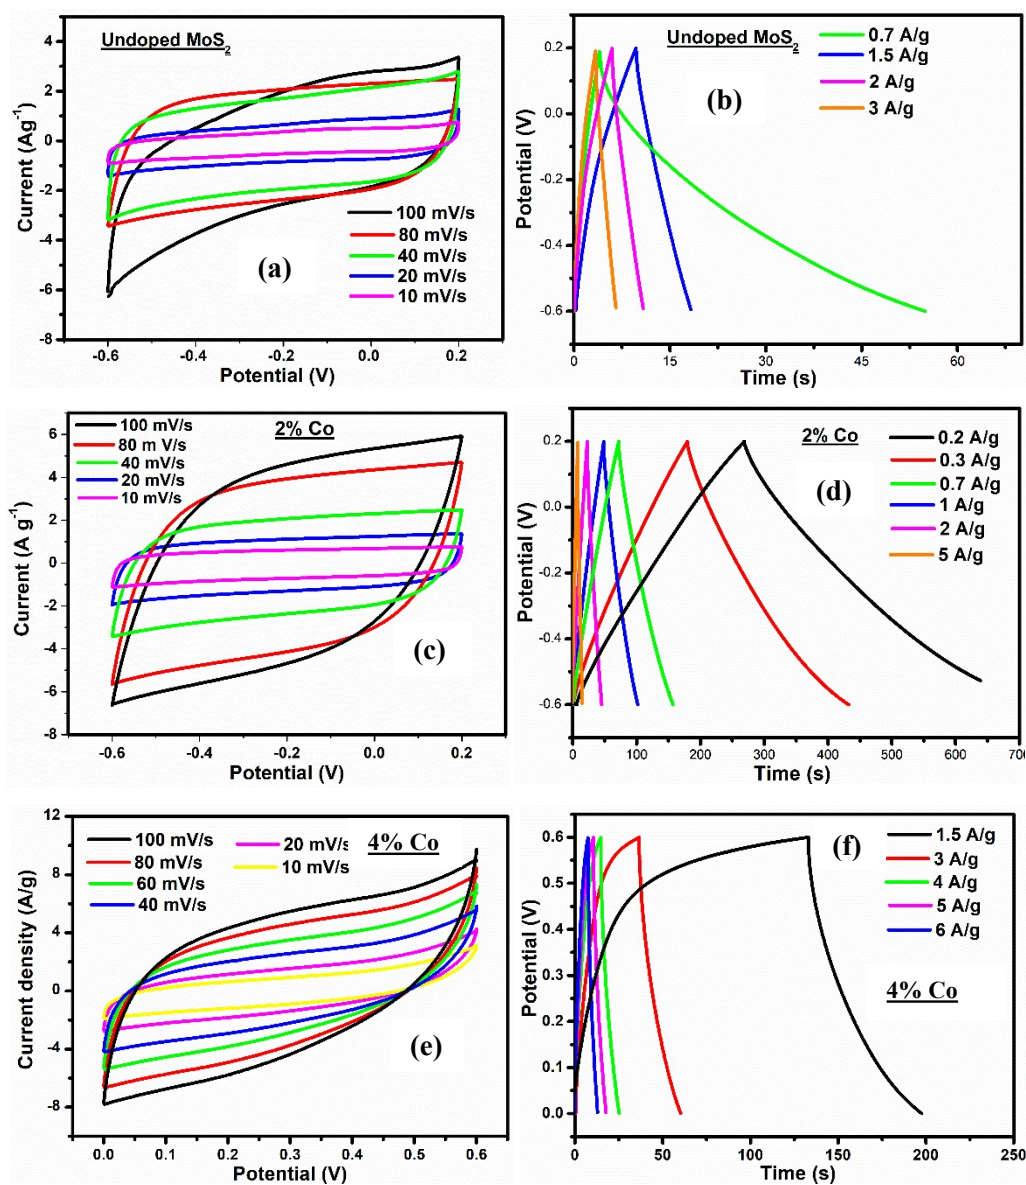

**Fig. S4** Left panel shows the CV curves of (a) undoped, (c) 2% Co (e) 4% Co doped MoS<sub>2</sub> at different scan rates; Right panel shows the GCD profile of (b) undoped MoS<sub>2</sub> and (d) 2% Co doped (f) 4% Co doped MoS<sub>2</sub> at different current densities.

**Table S1** Specific capacitance ( $C_{sp}$ ) values at different scan rates for undoped, 2% Co, 4% Co and 8% Co doped MoS<sub>2</sub> (From CV plots)

| Scan rate (mV/s) | $C_{sp}$ (MoS <sub>2</sub> ) (F/g) | $C_{sp}$ (2% Co) (F/g) | $C_{sp}$ (4% Co) (F/g) | $C_{sp}$ (8% Co) (F/g) |
|------------------|------------------------------------|------------------------|------------------------|------------------------|
| 100              | 41.4                               | 71.4                   | 79.3                   | 102.2                  |
| 80               | 58.1                               | 82.3                   | 85.2                   | 114.02                 |
| 60               | 66.8                               | 88.4                   | 89.44                  | 128.7                  |
| 40               | 72.5                               | 98.3                   | 102.08                 | 148.8                  |
| 20               | 85.9                               | 111.2                  | 127.5                  | 180.5                  |
| 10               | 98.1                               | 123.8                  | 162.8                  | 217.9                  |

**Table S2** Time of discharge current values and specific capacitance at different current densities for undoped, 2% Co, 4% Co and 8% Co-doped MoS<sub>2</sub>

| Undoped               |                  |                | 2% Co                 |                  |                | 4% Co                 |                  |                | 8% Co                 |                  |                |
|-----------------------|------------------|----------------|-----------------------|------------------|----------------|-----------------------|------------------|----------------|-----------------------|------------------|----------------|
| Current density (A/g) | $\Delta t$ (sec) | $C_{sp}$ (F/g) | Current density (A/g) | $\Delta t$ (sec) | $C_{sp}$ (F/g) | Current density (A/g) | $\Delta t$ (sec) | $C_{sp}$ (F/g) | Current density (A/g) | $\Delta t$ (sec) | $C_{sp}$ (F/g) |
| 0.7                   | 51               | 59.5           | 0.7                   | 85               | 99.1           | 1.5                   | 64               | 162.5          | 1.5                   | 187              | 201.4          |
| 1.5                   | 12               | 18             | 1                     | 53               | 88.3           | 3                     | 23               | 115            | 3                     | 82               | 173.6          |
| 2                     | 6                | 15             | 2                     | 22               | 73.3           | 4                     | 11               | 66.7           | 4                     | 48               | 137.1          |
| 3                     | 3                | 11.3           | 5                     | 5                | 41.6           | 5                     | 8                | 58.3           | 6                     | 29               | 124.3          |
| ----                  | ----             | ----           | ----                  | ----             | ----           | 6                     | 5                | 50             | 14                    | 7                | 70             |
